# Supplementary material
Source: MDPI journal article supplement (https://www.mdpi.com/1999-4907/6/2/416)
Supplement: s1 [file s1]

Supplementary

1. Estimating Site Index

For plots with no breast height age, but rather total age, model (1) below was used in estimating tree breast height age () from total age [1].

|  | (1) |
| --- | --- |

Where *T* is tree total age, is breast height age, *q* is a plot specific parameter.

To obtain the values of *q*, Equation (2) was solved numerically.

|  | (2) |
| --- | --- |

Equation 2is a transition function that links height *H1* at time *t*1 to height *H*2 at time *t*2. In solving for *q*, *H*1 is equated to 1.3 and *t*1=0.5.Using total height and age pairs, *q* is finally estimated.

2. Estimating Growth Index

The formula below was used to calculate growth index, GI (cm/year).

|  | (3) |
| --- | --- |

Where is mean height at breast height age, is breast height,is factor that corrects for the fact that breast height age might not correspond to nodal age. is normally assumed to be 0.5 or estimated as below;

|  | (4) |
| --- | --- |

and are nodal heights immediately below and above the breast height () respectively.

3. Modeling soil humus effect on SI

First, humus types were assigned codes

- Moder = zhum1
- Mor = zhum2
- Mull = zhum3
- Anmoor = zhum4
- Peatland humus = zhum5

Starting value of 0 was then assigned to the parameter of each humus type. The model then estimates the final parameter values after model runs.

**=0** **=0** **=0** **=0** **=0**

Humus sub-model is therefore;

**=** x zhum1 + x zhum2+ x zhum3+ x zhum4 + x zhum5;

4. Supplementary Figures

**Figure S1.** Plot distribution by longitude.

**Figure S2.** Variance explained by the random variable is related to regional plot density.

5. Supplementary Tables

**Table S1.** Parameter values of model 3 (main manuscript).

| **ABH** | ***b1*** | ***b2*** |
| --- | --- | --- |
| 1 | 2.658 | 0.000 |
| 2 | 2.948 | 0.000 |
| 3 | 2.761 | 0.000 |
| 4 | 3.806 | −0.272 |
| 5 | 0.151 | 0.688 |
| 6 | 0.002 | 0.719 |
| 7 | 3.023 | 0.000 |
| 8 | −0.337 | 0.823 |
| 9 | −2.605 | 1.392 |
| 10 | 0.376 | 0.668 |
| 11 | 0.599 | 0.607 |

**Table S1.** *Cont.*

| **ABH** | ***b1*** | ***b2*** |
| --- | --- | --- |
| 12 | −1.233 | 1.053 |
| 13 | −1.661 | 1.156 |
| 14 | 1.968 | 0.242 |
| 15 | −1.356 | 1.126 |
| 16 | −0.489 | 0.898 |
| 17 | −1.829 | 1.240 |
| 18 | −1.333 | 1.118 |
| 19 | −1.555 | 1.144 |
| 20 | −2.474 | 1.405 |
| 21 | 0.969 | 0.551 |
| 22 | −1.973 | 1.284 |
| 23 | −1.157 | 1.072 |
| 24 | 1.375 | 0.411 |
| 25 | 3.630 | −0.172 |
| 26 | −1.071 | 1.029 |
| 27 | 2.078 | 0.249 |
| 28 | 0.637 | 0.632 |
| 29 | −2.645 | 1.490 |
| 30 | −0.502 | 0.911 |

**Table S2.** Random parameter values of model 8.

| **Ecological District** | **Estimate ()** | **Standard Error** |
| --- | --- | --- |
| 0 | 2.576 | 1.468 |
| 244 | 3.229 | 0.523 |
| 245 | −0.024 | 0.855 |
| 248 | 3.445 | 0.815 |
| 249 | −0.435 | 1.088 |
| 252 | 3.519 | 1.021 |
| 349 | −4.081 | 1.791 |
| 353 | −2.426 | 2.070 |
| 354 | −1.244 | 1.109 |
| 355 | −0.066 | 1.793 |
| 356 | 1.453 | 1.905 |
| 357 | −1.558 | 1.905 |
| 358 | −2.174 | 0.628 |
| 359 | −2.653 | 2.124 |
| 363 | 0.141 | 1.786 |
| 371 | −1.146 | 1.527 |
| 372 | 2.893 | 0.991 |
| 373 | −1.257 | 1.491 |
| 374 | 1.839 | 1.748 |
| 375 | −2.546 | 0.997 |
| 376 | −4.105 | 1.376 |
| 377 | 2.446 | 1.127 |
| 379 | −0.917 | 1.832 |

**Table S2.** *Cont.*

| **Ecological District** | **Estimate ()** | **Standard Error** |
| --- | --- | --- |
| 380 | −2.462 | 1.328 |
| 382 | −0.211 | 1.992 |
| 383 | 1.082 | 1.613 |
| 387 | 2.143 | 1.436 |
| 388 | 2.628 | 1.107 |
| 389 | 1.098 | 1.482 |
| 391 | −0.759 | 1.654 |
| 397 | 0.430 | 2.063 |
| 398 | 0.750 | 1.407 |
| 400 | 2.583 | 1.646 |
| 401 | 1.274 | 0.422 |
| 403 | 2.829 | 2.219 |
| 404 | −0.365 | 1.351 |
| 406 | 2.684 | 1.636 |
| 407 | 3.884 | 1.167 |
| 408 | 2.076 | 0.456 |
| 409 | 3.601 | 1.645 |
| 410 | 1.199 | 2.150 |
| 414 | 1.235 | 0.699 |
| 415 | 0.369 | 0.488 |
| 416 | 1.173 | 0.944 |
| 417 | 0.738 | 0.530 |
| 418 | 0.713 | 0.439 |
| 419 | 2.037 | 1.696 |
| 420 | 1.917 | 0.521 |
| 421 | 0.168 | 0.460 |
| 422 | 2.237 | 0.590 |
| 423 | 2.086 | 0.572 |
| 428 | 0.521 | 1.930 |
| 430 | 1.050 | 1.710 |
| 431 | −0.244 | 0.920 |
| 433 | 0.288 | 1.345 |
| 437 | 0.892 | 1.228 |
| 438 | 0.697 | 0.576 |
| 439 | 1.017 | 0.513 |
| 440 | −0.185 | 0.443 |
| 441 | 0.278 | 0.432 |
| 478 | 0.614 | 0.471 |
| 479 | 0.818 | 0.422 |
| 480 | 0.355 | 0.560 |
| 481 | 0.705 | 0.570 |
| 482 | 0.321 | 0.460 |
| 484 | 1.552 | 0.571 |
| 487 | 0.923 | 0.492 |
| 540 | 0.378 | 0.723 |
| 572 | 1.198 | 0.621 |

**Table S2.** *Cont.*

| **Ecological District** | **Estimate ()** | **Standard Error** |
| --- | --- | --- |
| 581 | 0.252 | 1.918 |
| 582 | 0.000 | 2.740 |
| 583 | −1.092 | 1.833 |
| 584 | 1.657 | 1.729 |
| 585 | −0.090 | 0.638 |
| 586 | 4.603 | 1.015 |
| 591 | 1.312 | 0.912 |
| 600 | −2.816 | 1.758 |
| 601 | −0.069 | 1.542 |
| 607 | 3.710 | 0.707 |
| 610 | −4.146 | 0.949 |
| 612 | −0.012 | 1.248 |
| 613 | 0.831 | 0.978 |
| 614 | 1.176 | 1.122 |
| 615 | 0.034 | 0.705 |
| 616 | −0.981 | 1.202 |
| 617 | −3.765 | 1.286 |
| 618 | −4.469 | 0.604 |
| 619 | −3.366 | 0.870 |
| 620 | 0.510 | 1.568 |
| 621 | −3.772 | 1.296 |
| 623 | −2.758 | 1.729 |
| 638 | 5.103 | 1.364 |
| 643 | −1.999 | 2.061 |
| 644 | 3.921 | 0.917 |
| 646 | 0.555 | 0.735 |
| 650 | 2.172 | 0.688 |
| 653 | −8.380 | 0.987 |
| 654 | −4.569 | 1.943 |
| 655 | 0.939 | 1.463 |
| 656 | −1.037 | 0.640 |
| 657 | −2.856 | 0.778 |
| 658 | −5.729 | 0.630 |
| 659 | −4.887 | 1.058 |
| 660 | 0.741 | 1.377 |
| 661 | 1.571 | 1.380 |
| 662 | 1.060 | 2.237 |
| 664 | −0.560 | 0.928 |
| 665 | −2.836 | 1.163 |
| 667 | 0.491 | 1.587 |
| 675 | −3.113 | 1.950 |
| 678 | 1.718 | 0.998 |
| 682 | −0.713 | 1.732 |
| 689 | 0.079 | 1.223 |
| 693 | −8.218 | 1.365 |
| 698 | 4.068 | 1.698 |

**Table S2.** *Cont.*

| **Ecological District** | **Estimate ()** | **Standard Error** |
| --- | --- | --- |
| 704 | 1.856 | 1.770 |
| 711 | −0.182 | 1.813 |
| 714 | −3.169 | 1.633 |
| 715 | −0.532 | 2.071 |
| 717 | −2.449 | 1.451 |
| 723 | −0.278 | 2.057 |
| 920 | 0.000 | 2.740 |
| 933 | −0.591 | 2.128 |
| 965 | −0.333 | 1.831 |
| 967 | −2.989 | 1.260 |
| 968 | −0.829 | 1.567 |

References

1. Garcia, O. Building a dynamic growth model for trembling aspen in western Canada without age data. *Can. J. For. Res.* **2013**, *43*, 256–265.
